# Supplementary material for: Adverse Outcomes Associated With Corticosteroid Use in Critical COVID-19: A Retrospective Multicenter Cohort Study
Source: PubMed Central journal article supplement (PMC7900536; doi:10.3389/fmed.2021.604263), 2021-02-10
Supplement: Image_1.pdf [file Image_1.pdf]

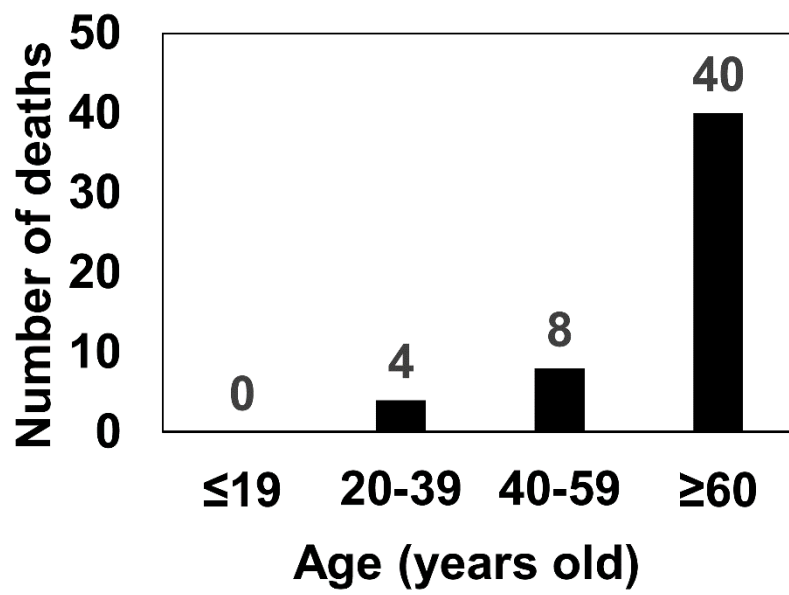

Supplementary Figure 1, Age distribution of the deceased COVID-19 patients.
